# Supplementary material for: The General Growth Tendency: A tool to improve publication trend reporting by removing record inflation bias and enabling quantitative trend analysis
Source: PLoS One. 2022 May 20;17(5):e0268433. doi: 10.1371/journal.pone.0268433 (PMC9122180; doi:10.1371/journal.pone.0268433)
Supplement: S2 File — (XLSX) [file pone.0268433.s002.xlsx]

## Sheet: Alzheimer's Disease
String/subfield	TOPIC: ("alzheimer"), Refined by: DOCUMENT TYPES: ( ARTICLE OR REVIEW )
Database	WoS, excluding ESCI
Year	Subfield	Yearly Percentual Increase	Biennial Average	Range (yearly)		Publication Years	Totals WoS (No ESCI)	Yearly Percentual Increase	Biennial Average	Range (yearly)		Year	GGT	Biennial GGT	Range (yearly)
2020	7724	-0.240437				2020	1489830	-0.247568				2020	0.00713159
2019	10169	0.139384	0.0884666	2019-2018		2019	1980020	0.114513	0.0810219	2019-2018		2019	0.024871	0.00744471	2019-2018
2018	8925	0.0375494	0.0671618	2018-2017		2018	1776579	0.047531	0.0420744	2018-2017		2018	-0.00998156	0.0250874	2018-2017
2017	8602	0.0967742	0.0760378	2017-2016		2017	1695968	0.0366179	0.0373671	2017-2016		2017	0.0601563	0.0386707	2017-2016
2016	7843	0.0553014	0.0462829	2016-2015		2016	1636059	0.0381164	0.0380407	2016-2015		2016	0.017185	0.00824221	2016-2015
2015	7432	0.0372645	0.0502393	2015-2014		2015	1575988	0.037965	0.0334267	2015-2014		2015	-0.000700566	0.0168126	2015-2014
2014	7165	0.0632141	0.0491954	2014-2013		2014	1518344	0.0288884	0.0419273	2014-2013		2014	0.0343257	0.00726812	2014-2013
2013	6739	0.0351767	0.08142	2013-2012		2013	1475713	0.0549661	0.0533745	2013-2012		2013	-0.0197895	0.0280454	2013-2012
2012	6510	0.127663	0.0763494	2012-2011		2012	1398825	0.0517829	0.0576369	2012-2011		2012	0.0758803	0.0187125	2012-2011
2011	5773	0.0250355	0.0745936	2011-2010		2011	1329956	0.0634909	0.0489897	2011-2010		2011	-0.0384554	0.0256039	2011-2010
2010	5632	0.124152	0.108661	2010-2009		2010	1250557	0.0344885	0.0393352	2010-2009		2010	0.0896631	0.0693259	2010-2009
2009	5010	0.0931704	0.0903678	2009-2008		2009	1208865	0.0441819	0.0580368	2009-2008		2009	0.0489886	0.032331	2009-2008
2008	4583	0.0875653	0.079506	2008-2007		2008	1157715	0.0718918	0.0610206	2008-2007		2008	0.0156734	0.0184854	2008-2007
2007	4214	0.0714467	0.0816701	2007-2006		2007	1080067	0.0501493	0.052072	2007-2006		2007	0.0212974	0.0295981	2007-2006
2006	3933	0.0918934	0.0714792	2006-2005		2006	1028489	0.0539946	0.0524883	2006-2005		2006	0.0378988	0.018991	2006-2005
2005	3602	0.0510651	0.0764972	2005-2004		2005	975801	0.0509819	0.0483295	2005-2004		2005	8.31292e-05	0.0281677	2005-2004
2004	3427	0.101929	0.0576443	2004-2003		2004	928466	0.045677	0.0449702	2004-2003		2004	0.0562523	0.0126741	2004-2003
2003	3110	0.0133594	0.0650858	2003-2002		2003	887909	0.0442634	0.0335741	2003-2002		2003	-0.030904	0.0315117	2003-2002
2002	3069	0.116812	0.0508792	2002-2001		2002	850273	0.0228848	0.0114797	2002-2001		2002	0.0939274	0.0393995	2002-2001
2001	2748	-0.0150538	0.0429861	2001-2000		2001	831250	7.4592e-05	0.0109239	2001-2000		2001	-0.0151284	0.0320622	2001-2000
2000	2790	0.101026	0.0270079	2000-1999		2000	831188	0.0217732	0.0198766	2000-1999		2000	0.0792528	0.00713131	2000-1999
1999	2534	-0.0470102	0.0251949	1999-1998		1999	813476	0.01798	0.0194678	1999-1998		1999	-0.0649902	0.0057271	1999-1998
1998	2659	0.0973999	0.078665	1998-1997		1998	799108	0.0209555	0.0170626	1998-1997		1998	0.0764444	0.0616024	1998-1997
1997	2423	0.05993	0.19219	1997-1996		1997	782706	0.0131697	0.0658095	1997-1996		1997	0.0467603	0.12638	1997-1996
1996	2286	0.32445	0.26699	1996-1995		1996	772532	0.118449	0.0845199	1996-1995		1996	0.206	0.18247	1996-1995
1995	1726	0.20953	0.176938	1995-1994		1995	690717	0.0505905	0.0468895	1995-1994		1995	0.15894	0.130049	1995-1994
1994	1427	0.144346	#DIV/0!	1994-1993		1994	657456	0.0431885	#DIV/0!	1994-1993		1994	0.101158	#DIV/0!	1994-1993
1993	1247	#DIV/0!	#DIV/0!	1993-1992		1993	630237	#DIV/0!	#DIV/0!	1993-1992		1993	#DIV/0!	#DIV/0!	1993-1992
1992		#DIV/0!	#DIV/0!	1992-1991		1992		#DIV/0!	#DIV/0!	1992-1991		1992	#DIV/0!	#DIV/0!	1992-1991
1991		#DIV/0!	#DIV/0!	1991-1990		1991		#DIV/0!	#DIV/0!	1991-1990		1991	#DIV/0!	#DIV/0!	1991-1990
1990		#DIV/0!	#DIV/0!	1990-1989		1990		#DIV/0!	#DIV/0!	1990-1989		1990	#DIV/0!	#DIV/0!	1990-1989
1989		#DIV/0!	#DIV/0!	1989-1988		1989		#DIV/0!	#DIV/0!	1989-1988		1989	#DIV/0!	#DIV/0!	1989-1988
1988		#DIV/0!	#DIV/0!	1988-1987		1988		#DIV/0!	#DIV/0!	1988-1987		1988	#DIV/0!	#DIV/0!	1988-1987
1987		#DIV/0!	#DIV/0!	1987-1986		1987		#DIV/0!	#DIV/0!	1987-1986		1987	#DIV/0!	#DIV/0!	1987-1986
1986		#DIV/0!	#DIV/0!	1986-1985		1986		#DIV/0!	#DIV/0!	1986-1985		1986	#DIV/0!	#DIV/0!	1986-1985
1985		#DIV/0!	#DIV/0!	1985-1984		1985		#DIV/0!	#DIV/0!	1985-1984		1985	#DIV/0!	#DIV/0!	1985-1984
1984		#DIV/0!	#DIV/0!	1984-1983		1984		#DIV/0!	#DIV/0!	1984-1983		1984	#DIV/0!	#DIV/0!	1984-1983
1983		#DIV/0!	#DIV/0!	1983-1982		1983		#DIV/0!	#DIV/0!	1983-1982		1983	#DIV/0!	#DIV/0!	1983-1982
1982		#DIV/0!	#DIV/0!	1982-1981		1982		#DIV/0!	#DIV/0!	1982-1981		1982	#DIV/0!	#DIV/0!	1982-1981
1981		#DIV/0!	#DIV/0!	1981-1980		1981		#DIV/0!	#DIV/0!	1981-1980		1981	#DIV/0!	#DIV/0!	1981-1980
1980		#DIV/0!	#DIV/0!	1980-1979		1980		#DIV/0!	#DIV/0!	1980-1979		1980	#DIV/0!	#DIV/0!	1980-1979
1979		#DIV/0!	#DIV/0!	1979-1978		1979		#DIV/0!	#DIV/0!	1979-1978		1979	#DIV/0!	#DIV/0!	1979-1978
1978		#DIV/0!	#DIV/0!	1978-1977		1978		#DIV/0!	#DIV/0!	1978-1977		1978	#DIV/0!	#DIV/0!	1978-1977
1977		#DIV/0!	#DIV/0!	1977-1976		1977		#DIV/0!	#DIV/0!	1977-1976		1977	#DIV/0!	#DIV/0!	1977-1976
1976		#DIV/0!	#DIV/0!	1976-1975		1976		#DIV/0!	#DIV/0!	1976-1975		1976	#DIV/0!	#DIV/0!	1976-1975
1975		#DIV/0!	#DIV/0!	1975-1974		1975		#DIV/0!	#DIV/0!	1975-1974		1975	#DIV/0!	#DIV/0!	1975-1974
1974		#DIV/0!	#DIV/0!	1974-1973		1974		#DIV/0!	#DIV/0!	1974-1973		1974	#DIV/0!	#DIV/0!	1974-1973
1973		#DIV/0!	#DIV/0!	1973-1972		1973		#DIV/0!	#DIV/0!	1973-1972		1973	#DIV/0!	#DIV/0!	1973-1972
1972		#DIV/0!	#DIV/0!	1972-1971		1972		#DIV/0!	#DIV/0!	1972-1971		1972	#DIV/0!	#DIV/0!	1972-1971
1971		#DIV/0!		1971-1970		1971		#DIV/0!		1971-1970		1971	#DIV/0!	0	1971-1970
1970						1970						1970	0	0

## Sheet: Microplastics
String/subfield	TOPIC: ("microplast*"), Refined by: DOCUMENT TYPES: ( ARTICLE OR REVIEW )
Database	WoS, excluding ESCI
Year	Field	Yearly Percentual Increase	Biennial Average	Range (yearly)		Publication Years	Totals WoS (No ESCI)	Yearly Percentual Increase	Biennial Average	Range (yearly)		Year	GGT	Biennial GGT	Range (yearly)
2020	1368	0.240254				2020	1489830	-0.247568				2020	0.487822
2019	1103	0.787682	0.746051	2019-2018		2019	1980020	0.114513	0.0810219	2019-2018		2019	0.67317	0.665029	2019-2018
2018	617	0.70442	0.660246	2018-2017		2018	1776579	0.047531	0.0420744	2018-2017		2018	0.656889	0.618171	2018-2017
2017	362	0.616071	0.535308	2017-2016		2017	1695968	0.0366179	0.0373671	2017-2016		2017	0.579454	0.497941	2017-2016
2016	224	0.454545	0.512987	2016-2015		2016	1636059	0.0381164	0.0380407	2016-2015		2016	0.416429	0.474946	2016-2015
2015	154	0.571429	0.588993	2015-2014		2015	1575988	0.037965	0.0334267	2015-2014		2015	0.533464	0.555566	2015-2014
2014	98	0.606557	0.547181	2014-2013		2014	1518344	0.0288884	0.0419273	2014-2013		2014	0.577669	0.505254	2014-2013
2013	61	0.487805	0.503162	2013-2012		2013	1475713	0.0549661	0.0533745	2013-2012		2013	0.432839	0.449787	2013-2012
2012	41	0.518519	0.194743	2012-2011		2012	1398825	0.0517829	0.0576369	2012-2011		2012	0.466736	0.137106	2012-2011
2011	27	-0.129032	0.0554839	2011-2010		2011	1329956	0.0634909	0.0489897	2011-2010		2011	-0.192523	0.00649414	2011-2010
2010	31	0.24	0.314444	2010-2009		2010	1250557	0.0344885	0.0393352	2010-2009		2010	0.205511	0.275109	2010-2009
2009	25	0.388889	0.103535	2009-2008		2009	1208865	0.0441819	0.0580368	2009-2008		2009	0.344707	0.0454985	2009-2008
2008	18	-0.181818	-0.0909091	2008-2007		2008	1157715	0.0718918	0.0610206	2008-2007		2008	-0.25371	-0.15193	2008-2007
2007	22	0	0.05	2007-2006		2007	1080067	0.0501493	0.052072	2007-2006		2007	-0.0501493	-0.00207196	2007-2006
2006	22	0.1	0.175	2006-2005		2006	1028489	0.0539946	0.0524883	2006-2005		2006	0.0460054	0.122512	2006-2005
2005	20	0.25	0.158333	2005-2004		2005	975801	0.0509819	0.0483295	2005-2004		2005	0.199018	0.110004	2005-2004
2004	16	0.0666667	0.158333	2004-2003		2004	928466	0.045677	0.0449702	2004-2003		2004	0.0209897	0.113363	2004-2003
2003	15	0.25	-0.102273	2003-2002		2003	887909	0.0442634	0.0335741	2003-2002		2003	0.205737	-0.135847	2003-2002
2002	12	-0.454545	0.189394	2002-2001		2002	850273	0.0228848	0.0114797	2002-2001		2002	-0.47743	0.177914	2002-2001
2001	22	0.833333	0.316667	2001-2000		2001	831250	7.4592e-05	0.0109239	2001-2000		2001	0.833259	0.305743	2001-2000
2000	12	-0.2	-0.372727	2000-1999		2000	831188	0.0217732	0.0198766	2000-1999		2000	-0.221773	-0.392604	2000-1999
1999	15	-0.545455	0.496503	1999-1998		1999	813476	0.01798	0.0194678	1999-1998		1999	-0.563435	0.477036	1999-1998
1998	33	1.53846	0.551839	1998-1997		1998	799108	0.0209555	0.0170626	1998-1997		1998	1.51751	0.534777	1998-1997
1997	13	-0.434783	-0.217391	1997-1996		1997	782706	0.0131697	0.0658095	1997-1996		1997	-0.447952	-0.283201	1997-1996
1996	23	0	0.9375	1996-1995		1996	772532	0.118449	0.0845199	1996-1995		1996	-0.118449	0.85298	1996-1995
1995	23	1.875	0.659722	1995-1994		1995	690717	0.0505905	0.0468895	1995-1994		1995	1.82441	0.612833	1995-1994
1994	8	-0.555556	-0.248366	1994-1993		1994	657456	0.0431885	0.0290413	1994-1993		1994	-0.598744	-0.277407	1994-1993
1993	18	0.0588235	0.237745	1993-1992		1993	630237	0.014894	0.0132306	1993-1992		1993	0.0439295	0.224514	1993-1992
1992	17	0.416667	#DIV/0!	1992-1991		1992	620988	0.0115673	0.0200604	1992-1991		1992	0.405099	#DIV/0!	1992-1991
1991	12	#DIV/0!	#DIV/0!	1991-1990		1991	613887	0.0285535	0.0281533	1991-1990		1991	#DIV/0!	#DIV/0!	1991-1990
1990		#DIV/0!	#DIV/0!	1990-1989		1990	596845	0.0277531	#DIV/0!	1990-1989		1990	#DIV/0!	#DIV/0!	1990-1989
1989		#DIV/0!	#DIV/0!	1989-1988		1989	580728	#DIV/0!	#DIV/0!	1989-1988		1989	#DIV/0!	#DIV/0!	1989-1988
1988		#DIV/0!	#DIV/0!	1988-1987		1988		#DIV/0!	#DIV/0!	1988-1987		1988	#DIV/0!	#DIV/0!	1988-1987
1987		#DIV/0!	#DIV/0!	1987-1986		1987		#DIV/0!	#DIV/0!	1987-1986		1987	#DIV/0!	#DIV/0!	1987-1986
1986		#DIV/0!	#DIV/0!	1986-1985		1986		#DIV/0!	#DIV/0!	1986-1985		1986	#DIV/0!	#DIV/0!	1986-1985
1985		#DIV/0!	#DIV/0!	1985-1984		1985		#DIV/0!	#DIV/0!	1985-1984		1985	#DIV/0!	#DIV/0!	1985-1984
1984		#DIV/0!	#DIV/0!	1984-1983		1984		#DIV/0!	#DIV/0!	1984-1983		1984	#DIV/0!	#DIV/0!	1984-1983
1983		#DIV/0!	#DIV/0!	1983-1982		1983		#DIV/0!	#DIV/0!	1983-1982		1983	#DIV/0!	#DIV/0!	1983-1982
1982		#DIV/0!	#DIV/0!	1982-1981		1982		#DIV/0!	#DIV/0!	1982-1981		1982	#DIV/0!	#DIV/0!	1982-1981
1981		#DIV/0!	#DIV/0!	1981-1980		1981		#DIV/0!	#DIV/0!	1981-1980		1981	#DIV/0!	#DIV/0!	1981-1980
1980		#DIV/0!	#DIV/0!	1980-1979		1980		#DIV/0!	#DIV/0!	1980-1979		1980	#DIV/0!	#DIV/0!	1980-1979
1979		#DIV/0!	#DIV/0!	1979-1978		1979		#DIV/0!	#DIV/0!	1979-1978		1979	#DIV/0!	#DIV/0!	1979-1978
1978		#DIV/0!	#DIV/0!	1978-1977		1978		#DIV/0!	#DIV/0!	1978-1977		1978	#DIV/0!	#DIV/0!	1978-1977
1977		#DIV/0!	#DIV/0!	1977-1976		1977		#DIV/0!	#DIV/0!	1977-1976		1977	#DIV/0!	#DIV/0!	1977-1976
1976		#DIV/0!	#DIV/0!	1976-1975		1976		#DIV/0!	#DIV/0!	1976-1975		1976	#DIV/0!	#DIV/0!	1976-1975
1975		#DIV/0!	#DIV/0!	1975-1974		1975		#DIV/0!	#DIV/0!	1975-1974		1975	#DIV/0!	#DIV/0!	1975-1974
1974		#DIV/0!	#DIV/0!	1974-1973		1974		#DIV/0!	#DIV/0!	1974-1973		1974	#DIV/0!	#DIV/0!	1974-1973
1973		#DIV/0!	#DIV/0!	1973-1972		1973		#DIV/0!	#DIV/0!	1973-1972		1973	#DIV/0!	#DIV/0!	1973-1972
1972		#DIV/0!	#DIV/0!	1972-1971		1972		#DIV/0!	#DIV/0!	1972-1971		1972	#DIV/0!	#DIV/0!	1972-1971
1971		#DIV/0!		1971-1970		1971		#DIV/0!		1971-1970		1971	#DIV/0!	0	1971-1970
1970						1970						1970	0	0

## Sheet: Machine Learning
String/subfield	(TS=("machine learning")) AND DOCUMENT TYPES: (Article OR Proceedings Paper OR Review)
Database	WoS, excluding ESCI
Year	Field	Yearly Percentual Increase	Biennial Average	Range (yearly)		Publication Years	Totals WoS (No ESCI)	Yearly Percentual Increase	Biennial Average	Range (yearly)		Year	GGT	Biennial GGT	Range (yearly)
2020	17626	-0.324234				2020	1489830	-0.247568				2020	-0.076666
2019	26083	0.374888	0.42902	2019-2018		2019	1980020	0.114513	0.0810219	2019-2018		2019	0.260375	0.347998	2019-2018
2018	18971	0.483152	0.424856	2018-2017		2018	1776579	0.047531	0.0420744	2018-2017		2018	0.435621	0.382782	2018-2017
2017	12791	0.36656	0.319063	2017-2016		2017	1695968	0.0366179	0.0373671	2017-2016		2017	0.329942	0.281696	2017-2016
2016	9360	0.271566	0.328257	2016-2015		2016	1636059	0.0381164	0.0380407	2016-2015		2016	0.23345	0.290217	2016-2015
2015	7361	0.384948	0.357847	2015-2014		2015	1575988	0.037965	0.0334267	2015-2014		2015	0.346983	0.32442	2015-2014
2014	5315	0.330746	0.315227	2014-2013		2014	1518344	0.0288884	0.0419273	2014-2013		2014	0.301858	0.273299	2014-2013
2013	3994	0.299707	0.214536	2013-2012		2013	1475713	0.0549661	0.0533745	2013-2012		2013	0.244741	0.161161	2013-2012
2012	3073	0.129364	0.126176	2012-2011		2012	1398825	0.0517829	0.0576369	2012-2011		2012	0.0775813	0.0685392	2012-2011
2011	2721	0.122988	0.0238986	2011-2010		2011	1329956	0.0634909	0.0489897	2011-2010		2011	0.0594971	-0.0250911	2011-2010
2010	2423	-0.0751908	0.0745541	2010-2009		2010	1250557	0.0344885	0.0393352	2010-2009		2010	-0.109679	0.0352189	2010-2009
2009	2620	0.224299	0.193671	2009-2008		2009	1208865	0.0441819	0.0580368	2009-2008		2009	0.180117	0.135634	2009-2008
2008	2140	0.163043	0.145247	2008-2007		2008	1157715	0.0718918	0.0610206	2008-2007		2008	0.0911516	0.0842267	2008-2007
2007	1840	0.127451	0.157612	2007-2006		2007	1080067	0.0501493	0.052072	2007-2006		2007	0.0773017	0.10554	2007-2006
2006	1632	0.187773	0.240171	2006-2005		2006	1028489	0.0539946	0.0524883	2006-2005		2006	0.133778	0.187682	2006-2005
2005	1374	0.292568	0.326822	2005-2004		2005	975801	0.0509819	0.0483295	2005-2004		2005	0.241586	0.278492	2005-2004
2004	1063	0.361076	0.362039	2004-2003		2004	928466	0.045677	0.0449702	2004-2003		2004	0.315399	0.317068	2004-2003
2003	781	0.363002	0.349333	2003-2002		2003	887909	0.0442634	0.0335741	2003-2002		2003	0.318738	0.315759	2003-2002
2002	573	0.335664	0.160936	2002-2001		2002	850273	0.0228848	0.0114797	2002-2001		2002	0.31278	0.149456	2002-2001
2001	429	-0.0137931	0.196987	2001-2000		2001	831250	7.4592e-05	0.0109239	2001-2000		2001	-0.0138677	0.186063	2001-2000
2000	435	0.407767	0.173488	2000-1999		2000	831188	0.0217732	0.0198766	2000-1999		2000	0.385994	0.153612	2000-1999
1999	309	-0.0607903	0.00718656	1999-1998		1999	813476	0.01798	0.0194678	1999-1998		1999	-0.0787703	-0.0122812	1999-1998
1998	329	0.0751634	0.291276	1998-1997		1998	799108	0.0209555	0.0170626	1998-1997		1998	0.0542079	0.274214	1998-1997
1997	306	0.507389	0.311387	1997-1996		1997	782706	0.0131697	0.0658095	1997-1996		1997	0.494219	0.245577	1997-1996
1996	203	0.115385	0.17674	1996-1995		1996	772532	0.118449	0.0845199	1996-1995		1996	-0.00306476	0.09222	1996-1995
1995	182	0.238095	0.221507	1995-1994		1995	690717	0.0505905	0.0468895	1995-1994		1995	0.187505	0.174617	1995-1994
1994	147	0.204918	0.137547	1994-1993		1994	657456	0.0431885	0.0290413	1994-1993		1994	0.16173	0.108505	1994-1993
1993	122	0.0701754	0.0994442	1993-1992		1993	630237	0.014894	0.0132306	1993-1992		1993	0.0552814	0.0862135	1993-1992
1992	114	0.128713	1.09466	1992-1991		1992	620988	0.0115673	0.0200604	1992-1991		1992	0.117146	1.0746	1992-1991
1991	101	2.06061	#DIV/0!	1991-1990		1991	613887	0.0285535	0.0281533	1991-1990		1991	2.03205	#DIV/0!	1991-1990
1990	33	#DIV/0!	#DIV/0!	1990-1989		1990	596845	0.0277531	0.0294431	1990-1989		1990	#DIV/0!	#DIV/0!	1990-1989
1989		#DIV/0!	#DIV/0!	1989-1988		1989	580728	0.0311331	0.0263974	1989-1988		1989	#DIV/0!	#DIV/0!	1989-1988
1988		#DIV/0!	#DIV/0!	1988-1987		1988	563194	0.0216616	0.0249663	1988-1987		1988	#DIV/0!	#DIV/0!	1988-1987
1987		#DIV/0!	#DIV/0!	1987-1986		1987	551253	0.028271	0.0168465	1987-1986		1987	#DIV/0!	#DIV/0!	1987-1986
1986		#DIV/0!	#DIV/0!	1986-1985		1986	536097	0.00542192	0.00931902	1986-1985		1986	#DIV/0!	#DIV/0!	1986-1985
1985		#DIV/0!	#DIV/0!	1985-1984		1985	533206	0.0132161	0.0203735	1985-1984		1985	#DIV/0!	#DIV/0!	1985-1984
1984		#DIV/0!	#DIV/0!	1984-1983		1984	526251	0.0275309	0.0403816	1984-1983		1984	#DIV/0!	#DIV/0!	1984-1983
1983		#DIV/0!	#DIV/0!	1983-1982		1983	512151	0.0532322	0.0484514	1983-1982		1983	#DIV/0!	#DIV/0!	1983-1982
1982		#DIV/0!	#DIV/0!	1982-1981		1982	486266	0.0436707	0.0446443	1982-1981		1982	#DIV/0!	#DIV/0!	1982-1981
1981		#DIV/0!	#DIV/0!	1981-1980		1981	465919	0.045618	0.0354575	1981-1980		1981	#DIV/0!	#DIV/0!	1981-1980
1980		#DIV/0!	#DIV/0!	1980-1979		1980	445592	0.0252969	0.0215848	1980-1979		1980	#DIV/0!	#DIV/0!	1980-1979
1979		#DIV/0!	#DIV/0!	1979-1978		1979	434598	0.0178726	0.0264106	1979-1978		1979	#DIV/0!	#DIV/0!	1979-1978
1978		#DIV/0!	#DIV/0!	1978-1977		1978	426967	0.0349486	0.0901917	1978-1977		1978	#DIV/0!	#DIV/0!	1978-1977
1977		#DIV/0!	#DIV/0!	1977-1976		1977	412549	0.145435	0.10739	1977-1976		1977	#DIV/0!	#DIV/0!	1977-1976
1976		#DIV/0!	#DIV/0!	1976-1975		1976	360168	0.0693443	0.0569893	1976-1975		1976	#DIV/0!	#DIV/0!	1976-1975
1975		#DIV/0!	#DIV/0!	1975-1974		1975	336812	0.0446342	0.0648065	1975-1974		1975	#DIV/0!	#DIV/0!	1975-1974
1974		#DIV/0!	#DIV/0!	1974-1973		1974	322421	0.0849789	0.0479614	1974-1973		1974	#DIV/0!	#DIV/0!	1974-1973
1973		#DIV/0!	#DIV/0!	1973-1972		1973	297168	0.010944	0.0441023	1973-1972		1973	#DIV/0!	#DIV/0!	1973-1972
1972		#DIV/0!	#DIV/0!	1972-1971		1972	293951	0.0772605	0.069541	1972-1971		1972	#DIV/0!	#DIV/0!	1972-1971
1971		#DIV/0!		1971-1970		1971	272869	0.0618215		1971-1970		1971	#DIV/0!	0	1971-1970
1970						1970	256982					1970	0	0

## Sheet: Microbiome
String/subfield	TS=((human microbiota or human microbiome or microbiome or human microbial or human microbes or gut ecology)), Refined by: DOCUMENT TYPES: ( ARTICLE OR REVIEW OR PROCEEDINGS PAPER OR EDITORIAL MATERIAL )
Database	WoS, excluding ESCI
Year	Field	Yearly Percentual Increase	Biennial Average	Range (yearly)		Publication Years	Totals WoS (No ESCI)	Yearly Percentual Increase	Biennial Average	Range (yearly)		Year	GGT	Biennial GGT	Range (yearly)
2020	9147	-0.162899				2020	1489830	-0.247568				2020	0.084669
2019	10927	0.233574	0.211923	2019-2018		2019	1980020	0.114513	0.0810219	2019-2018		2019	0.119061	0.130901	2019-2018
2018	8858	0.190271	0.201853	2018-2017		2018	1776579	0.047531	0.0420744	2018-2017		2018	0.14274	0.159779	2018-2017
2017	7442	0.213436	0.228348	2017-2016		2017	1695968	0.0366179	0.0373671	2017-2016		2017	0.176818	0.19098	2017-2016
2016	6133	0.24326	0.237331	2016-2015		2016	1636059	0.0381164	0.0380407	2016-2015		2016	0.205143	0.199291	2016-2015
2015	4933	0.231403	0.2043	2015-2014		2015	1575988	0.037965	0.0334267	2015-2014		2015	0.193438	0.170873	2015-2014
2014	4006	0.177197	0.212544	2014-2013		2014	1518344	0.0288884	0.0419273	2014-2013		2014	0.148308	0.170617	2014-2013
2013	3403	0.247891	0.226997	2013-2012		2013	1475713	0.0549661	0.0533745	2013-2012		2013	0.192925	0.173623	2013-2012
2012	2727	0.206103	0.201834	2012-2011		2012	1398825	0.0517829	0.0576369	2012-2011		2012	0.154321	0.144197	2012-2011
2011	2261	0.197564	0.191374	2011-2010		2011	1329956	0.0634909	0.0489897	2011-2010		2011	0.134073	0.142385	2011-2010
2010	1888	0.185185	0.176537	2010-2009		2010	1250557	0.0344885	0.0393352	2010-2009		2010	0.150697	0.137202	2010-2009
2009	1593	0.167889	0.169855	2009-2008		2009	1208865	0.0441819	0.0580368	2009-2008		2009	0.123707	0.111818	2009-2008
2008	1364	0.171821	0.169077	2008-2007		2008	1157715	0.0718918	0.0610206	2008-2007		2008	0.0999295	0.108056	2008-2007
2007	1164	0.166333	0.0954867	2007-2006		2007	1080067	0.0501493	0.052072	2007-2006		2007	0.116183	0.0434147	2007-2006
2006	998	0.0246407	0.114298	2006-2005		2006	1028489	0.0539946	0.0524883	2006-2005		2006	-0.029354	0.0618098	2006-2005
2005	974	0.203956	0.163004	2005-2004		2005	975801	0.0509819	0.0483295	2005-2004		2005	0.152974	0.114675	2005-2004
2004	809	0.122053	0.156894	2004-2003		2004	928466	0.045677	0.0449702	2004-2003		2004	0.0763757	0.111924	2004-2003
2003	721	0.191736	0.13032	2003-2002		2003	887909	0.0442634	0.0335741	2003-2002		2003	0.147472	0.0967459	2003-2002
2002	605	0.0689046	0.0575577	2002-2001		2002	850273	0.0228848	0.0114797	2002-2001		2002	0.0460198	0.046078	2002-2001
2001	566	0.0462107	0.113717	2001-2000		2001	831250	7.4592e-05	0.0109239	2001-2000		2001	0.0461361	0.102793	2001-2000
2000	541	0.181223	0.165988	2000-1999		2000	831188	0.0217732	0.0198766	2000-1999		2000	0.159449	0.146112	2000-1999
1999	458	0.150754	0.157248	1999-1998		1999	813476	0.01798	0.0194678	1999-1998		1999	0.132774	0.13778	1999-1998
1998	398	0.163743	0.121304	1998-1997		1998	799108	0.0209555	0.0170626	1998-1997		1998	0.142787	0.104241	1998-1997
1997	342	0.0788644	0.0677655	1997-1996		1997	782706	0.0131697	0.0658095	1997-1996		1997	0.0656947	0.00195598	1997-1996
1996	317	0.0566667	0.128333	1996-1995		1996	772532	0.118449	0.0845199	1996-1995		1996	-0.0617827	0.0438134	1996-1995
1995	300	0.2	0.195238	1995-1994		1995	690717	0.0505905	0.0468895	1995-1994		1995	0.14941	0.148349	1995-1994
1994	250	0.190476	0.0364146	1994-1993		1994	657456	0.0431885	0.0290413	1994-1993		1994	0.147288	0.0073733	1994-1993
1993	210	-0.117647	0.0483193	1993-1992		1993	630237	0.014894	0.0132306	1993-1992		1993	-0.132541	0.0350887	1993-1992
1992	238	0.214286	4.50714	1992-1991		1992	620988	0.0115673	0.0200604	1992-1991		1992	0.202718	4.48708	1992-1991
1991	196	8.8	#DIV/0!	1991-1990		1991	613887	0.0285535	0.0281533	1991-1990		1991	8.77145	#DIV/0!	1991-1990
1990	20	#DIV/0!	#DIV/0!	1990-1989		1990	596845	0.0277531	#DIV/0!	1990-1989		1990	#DIV/0!	#DIV/0!	1990-1989
1989		#DIV/0!	#DIV/0!	1989-1988		1989	580728	#DIV/0!	#DIV/0!	1989-1988		1989	#DIV/0!	#DIV/0!	1989-1988
1988		#DIV/0!	#DIV/0!	1988-1987		1988		#DIV/0!	#DIV/0!	1988-1987		1988	#DIV/0!	#DIV/0!	1988-1987
1987		#DIV/0!	#DIV/0!	1987-1986		1987		#DIV/0!	#DIV/0!	1987-1986		1987	#DIV/0!	#DIV/0!	1987-1986
1986		#DIV/0!	#DIV/0!	1986-1985		1986		#DIV/0!	#DIV/0!	1986-1985		1986	#DIV/0!	#DIV/0!	1986-1985
1985		#DIV/0!	#DIV/0!	1985-1984		1985		#DIV/0!	#DIV/0!	1985-1984		1985	#DIV/0!	#DIV/0!	1985-1984
1984		#DIV/0!	#DIV/0!	1984-1983		1984		#DIV/0!	#DIV/0!	1984-1983		1984	#DIV/0!	#DIV/0!	1984-1983
1983		#DIV/0!	#DIV/0!	1983-1982		1983		#DIV/0!	#DIV/0!	1983-1982		1983	#DIV/0!	#DIV/0!	1983-1982
1982		#DIV/0!	#DIV/0!	1982-1981		1982		#DIV/0!	#DIV/0!	1982-1981		1982	#DIV/0!	#DIV/0!	1982-1981
1981		#DIV/0!	#DIV/0!	1981-1980		1981		#DIV/0!	#DIV/0!	1981-1980		1981	#DIV/0!	#DIV/0!	1981-1980
1980		#DIV/0!	#DIV/0!	1980-1979		1980		#DIV/0!	#DIV/0!	1980-1979		1980	#DIV/0!	#DIV/0!	1980-1979
1979		#DIV/0!	#DIV/0!	1979-1978		1979		#DIV/0!	#DIV/0!	1979-1978		1979	#DIV/0!	#DIV/0!	1979-1978
1978		#DIV/0!	#DIV/0!	1978-1977		1978		#DIV/0!	#DIV/0!	1978-1977		1978	#DIV/0!	#DIV/0!	1978-1977
1977		#DIV/0!	#DIV/0!	1977-1976		1977		#DIV/0!	#DIV/0!	1977-1976		1977	#DIV/0!	#DIV/0!	1977-1976
1976		#DIV/0!	#DIV/0!	1976-1975		1976		#DIV/0!	#DIV/0!	1976-1975		1976	#DIV/0!	#DIV/0!	1976-1975
1975		#DIV/0!	#DIV/0!	1975-1974		1975		#DIV/0!	#DIV/0!	1975-1974		1975	#DIV/0!	#DIV/0!	1975-1974
1974		#DIV/0!	#DIV/0!	1974-1973		1974		#DIV/0!	#DIV/0!	1974-1973		1974	#DIV/0!	#DIV/0!	1974-1973
1973		#DIV/0!	#DIV/0!	1973-1972		1973		#DIV/0!	#DIV/0!	1973-1972		1973	#DIV/0!	#DIV/0!	1973-1972
1972		#DIV/0!	#DIV/0!	1972-1971		1972		#DIV/0!	#DIV/0!	1972-1971		1972	#DIV/0!	#DIV/0!	1972-1971
1971		#DIV/0!		1971-1970		1971		#DIV/0!		1971-1970		1971	#DIV/0!	0	1971-1970
1970						1970						1970	0	0

## Sheet: Obesity
String/subfield	(TS=(obes* OR overw*) AND PY=(1970-2020)) AND DOCUMENT TYPES: (Article OR Review)
Database	WoS, excluding ESCI
Year	Field	Yearly Percentual Increase	Biennial Average	Range (yearly)		Publication Years	Totals WoS (No ESCI)	Yearly Percentual Increase	Biennial Average	Range (yearly)		Year	GGT	Biennial GGT	Range (yearly)
2020	22949	-0.245397				2020	1489830	-0.247568				2020	0.00217165
2019	30412	0.0926598	0.0740698	2019-2018		2019	1980020	0.114513	0.0810219	2019-2018		2019	-0.021853	-0.00695212	2019-2018
2018	27833	0.0554797	0.0369312	2018-2017		2018	1776579	0.047531	0.0420744	2018-2017		2018	0.00794874	-0.00514325	2018-2017
2017	26370	0.0183826	0.0344246	2017-2016		2017	1695968	0.0366179	0.0373671	2017-2016		2017	-0.0182352	-0.00294256	2017-2016
2016	25894	0.0504665	0.055204	2016-2015		2016	1636059	0.0381164	0.0380407	2016-2015		2016	0.0123501	0.0171633	2016-2015
2015	24650	0.0599415	0.0493561	2015-2014		2015	1575988	0.037965	0.0334267	2015-2014		2015	0.0219765	0.0159294	2015-2014
2014	23256	0.0387708	0.0801508	2014-2013		2014	1518344	0.0288884	0.0419273	2014-2013		2014	0.00988236	0.0382236	2014-2013
2013	22388	0.121531	0.111289	2013-2012		2013	1475713	0.0549661	0.0533745	2013-2012		2013	0.0665648	0.0579149	2013-2012
2012	19962	0.101048	0.0971352	2012-2011		2012	1398825	0.0517829	0.0576369	2012-2011		2012	0.0492651	0.0394983	2012-2011
2011	18130	0.0932224	0.100815	2011-2010		2011	1329956	0.0634909	0.0489897	2011-2010		2011	0.0297315	0.0518254	2011-2010
2010	16584	0.108408	0.101901	2010-2009		2010	1250557	0.0344885	0.0393352	2010-2009		2010	0.0739194	0.0625663	2010-2009
2009	14962	0.095395	0.104254	2009-2008		2009	1208865	0.0441819	0.0580368	2009-2008		2009	0.0512131	0.0462167	2009-2008
2008	13659	0.113112	0.164814	2008-2007		2008	1157715	0.0718918	0.0610206	2008-2007		2008	0.0412204	0.103794	2008-2007
2007	12271	0.216516	0.186509	2007-2006		2007	1080067	0.0501493	0.052072	2007-2006		2007	0.166367	0.134437	2007-2006
2006	10087	0.156501	0.141178	2006-2005		2006	1028489	0.0539946	0.0524883	2006-2005		2006	0.102506	0.0886897	2006-2005
2005	8722	0.125855	0.144534	2005-2004		2005	975801	0.0509819	0.0483295	2005-2004		2005	0.0748732	0.0962047	2005-2004
2004	7747	0.163213	0.139863	2004-2003		2004	928466	0.045677	0.0449702	2004-2003		2004	0.117536	0.0948929	2004-2003
2003	6660	0.116513	0.11814	2003-2002		2003	887909	0.0442634	0.0335741	2003-2002		2003	0.0722496	0.084566	2003-2002
2002	5965	0.119767	0.0815248	2002-2001		2002	850273	0.0228848	0.0114797	2002-2001		2002	0.0968824	0.0700451	2002-2001
2001	5327	0.0432824	0.0646016	2001-2000		2001	831250	7.4592e-05	0.0109239	2001-2000		2001	0.0432078	0.0536777	2001-2000
2000	5106	0.0859209	0.0772786	2000-1999		2000	831188	0.0217732	0.0198766	2000-1999		2000	0.0641477	0.057402	2000-1999
1999	4702	0.0686364	0.0760567	1999-1998		1999	813476	0.01798	0.0194678	1999-1998		1999	0.0506563	0.0565889	1999-1998
1998	4400	0.083477	0.104672	1998-1997		1998	799108	0.0209555	0.0170626	1998-1997		1998	0.0625215	0.0876091	1998-1997
1997	4061	0.125866	0.141163	1997-1996		1997	782706	0.0131697	0.0658095	1997-1996		1997	0.112697	0.0753539	1997-1996
1996	3607	0.15646	0.159266	1996-1995		1996	772532	0.118449	0.0845199	1996-1995		1996	0.038011	0.0747461	1996-1995
1995	3119	0.162072	0.103418	1995-1994		1995	690717	0.0505905	0.0468895	1995-1994		1995	0.111481	0.0565285	1995-1994
1994	2684	0.0447645	0.0133991	1994-1993		1994	657456	0.0431885	0.0290413	1994-1993		1994	0.00157599	-0.0156422	1994-1993
1993	2569	-0.0179664	0.0408277	1993-1992		1993	630237	0.014894	0.0132306	1993-1992		1993	-0.0328604	0.027597	1993-1992
1992	2616	0.0996217	1.00753	1992-1991		1992	620988	0.0115673	0.0200604	1992-1991		1992	0.0880544	0.987471	1992-1991
1991	2379	1.91544	1.08832	1991-1990		1991	613887	0.0285535	0.0281533	1991-1990		1991	1.88689	1.06017	1991-1990
1990	816	0.261206	0.162675	1990-1989		1990	596845	0.0277531	0.0294431	1990-1989		1990	0.233452	0.133232	1990-1989
1989	647	0.0641447	0.024779	1989-1988		1989	580728	0.0311331	0.0263974	1989-1988		1989	0.0330116	-0.00161834	1989-1988
1988	608	-0.0145867	0.0465666	1988-1987		1988	563194	0.0216616	0.0249663	1988-1987		1988	-0.0362483	0.0216003	1988-1987
1987	617	0.10772	0.0242992	1987-1986		1987	551253	0.028271	0.0168465	1987-1986		1987	0.0794489	0.00745269	1987-1986
1986	557	-0.0591216	0.0125637	1986-1985		1986	536097	0.00542192	0.00931902	1986-1985		1986	-0.0645435	0.00324471	1986-1985
1985	592	0.0842491	0.05917	1985-1984		1985	533206	0.0132161	0.0203735	1985-1984		1985	0.071033	0.0387965	1985-1984
1984	546	0.0340909	-0.0189827	1984-1983		1984	526251	0.0275309	0.0403816	1984-1983		1984	0.00655997	-0.0593642	1984-1983
1983	528	-0.0720562	0.041051	1983-1982		1983	512151	0.0532322	0.0484514	1983-1982		1983	-0.125288	-0.00740044	1983-1982
1982	569	0.154158	0.0863766	1982-1981		1982	486266	0.0436707	0.0446443	1982-1981		1982	0.110488	0.0417323	1982-1981
1981	493	0.018595	0.00317507	1981-1980		1981	465919	0.045618	0.0354575	1981-1980		1981	-0.0270229	-0.0322824	1981-1980
1980	484	-0.0122449	0.0207593	1980-1979		1980	445592	0.0252969	0.0215848	1980-1979		1980	-0.0375418	-0.000825487	1980-1979
1979	490	0.0537634	0.062596	1979-1978		1979	434598	0.0178726	0.0264106	1979-1978		1979	0.0358909	0.0361854	1979-1978
1978	465	0.0714286	0.19329	1978-1977		1978	426967	0.0349486	0.0901917	1978-1977		1978	0.03648	0.103098	1978-1977
1977	434	0.315152	0.176444	1977-1976		1977	412549	0.145435	0.10739	1977-1976		1977	0.169717	0.0690541	1977-1976
1976	330	0.0377358	0.0807054	1976-1975		1976	360168	0.0693443	0.0569893	1976-1975		1976	-0.0316085	0.0237161	1976-1975
1975	318	0.123675	0.174392	1975-1974		1975	336812	0.0446342	0.0648065	1975-1974		1975	0.0790407	0.109585	1975-1974
1974	283	0.225108	0.170525	1974-1973		1974	322421	0.0849789	0.0479614	1974-1973		1974	0.140129	0.122564	1974-1973
1973	231	0.115942	0.1494	1973-1972		1973	297168	0.010944	0.0441023	1973-1972		1973	0.104998	0.105297	1973-1972
1972	207	0.182857	0.167086	1972-1971		1972	293951	0.0772605	0.069541	1972-1971		1972	0.105597	0.0975455	1972-1971
1971	175	0.151316		1971-1970		1971	272869	0.0618215		1971-1970		1971	0.0894943	0	1971-1970
1970	152					1970	256982					1970	0	0

## Sheet: NAFLD
String/subfield	(TS=(NAFLD OR ((nonalcoholic OR non-alcoholic) AND liver) AND PY=(1970-2020)) AND DOCUMENT TYPES: (Article OR Review)
Database	WoS, excluding ESCI
Year	Field	Yearly Percentual Increase	Biennial Average	Range (yearly)		Publication Years	Totals WoS (No ESCI)	Yearly Percentual Increase	Biennial Average	Range (yearly)		Year	GGT	Biennial GGT	Range (yearly)
2020	2412	-0.180985				2020	1489830	-0.247568				2020	0.0665835
2019	2945	0.161736	0.154657	2019-2018		2019	1980020	0.114513	0.0810219	2019-2018		2019	0.0472229	0.073635	2019-2018
2018	2535	0.147578	0.11976	2018-2017		2018	1776579	0.047531	0.0420744	2018-2017		2018	0.100047	0.077686	2018-2017
2017	2209	0.0919427	0.111371	2017-2016		2017	1695968	0.0366179	0.0373671	2017-2016		2017	0.0553248	0.0740039	2017-2016
2016	2023	0.130799	0.134058	2016-2015		2016	1636059	0.0381164	0.0380407	2016-2015		2016	0.0926829	0.0960176	2016-2015
2015	1789	0.137317	0.144006	2015-2014		2015	1575988	0.037965	0.0334267	2015-2014		2015	0.0993522	0.110579	2015-2014
2014	1573	0.150695	0.169695	2014-2013		2014	1518344	0.0288884	0.0419273	2014-2013		2014	0.121807	0.127768	2014-2013
2013	1367	0.188696	0.172819	2013-2012		2013	1475713	0.0549661	0.0533745	2013-2012		2013	0.13373	0.119444	2013-2012
2012	1150	0.156942	0.159757	2012-2011		2012	1398825	0.0517829	0.0576369	2012-2011		2012	0.105159	0.10212	2012-2011
2011	994	0.162573	0.141575	2011-2010		2011	1329956	0.0634909	0.0489897	2011-2010		2011	0.0990822	0.0925852	2011-2010
2010	855	0.120577	0.175611	2010-2009		2010	1250557	0.0344885	0.0393352	2010-2009		2010	0.0860881	0.136276	2010-2009
2009	763	0.230645	0.201334	2009-2008		2009	1208865	0.0441819	0.0580368	2009-2008		2009	0.186463	0.143297	2009-2008
2008	620	0.172023	0.255632	2008-2007		2008	1157715	0.0718918	0.0610206	2008-2007		2008	0.100131	0.194611	2008-2007
2007	529	0.339241	0.210716	2007-2006		2007	1080067	0.0501493	0.052072	2007-2006		2007	0.289091	0.158644	2007-2006
2006	395	0.0821918	0.237661	2006-2005		2006	1028489	0.0539946	0.0524883	2006-2005		2006	0.0281972	0.185172	2006-2005
2005	365	0.39313	0.375321	2005-2004		2005	975801	0.0509819	0.0483295	2005-2004		2005	0.342148	0.326992	2005-2004
2004	262	0.357513	0.383136	2004-2003		2004	928466	0.045677	0.0449702	2004-2003		2004	0.311836	0.338166	2004-2003
2003	193	0.408759	0.396299	2003-2002		2003	887909	0.0442634	0.0335741	2003-2002		2003	0.364496	0.362725	2003-2002
2002	137	0.383838	0.30303	2002-2001		2002	850273	0.0228848	0.0114797	2002-2001		2002	0.360954	0.291551	2002-2001
2001	99	0.222222	0.206699	2001-2000		2001	831250	7.4592e-05	0.0109239	2001-2000		2001	0.222148	0.195775	2001-2000
2000	81	0.191176	0.249434	2000-1999		2000	831188	0.0217732	0.0198766	2000-1999		2000	0.169403	0.229558	2000-1999
1999	68	0.307692	0.109987	1999-1998		1999	813476	0.01798	0.0194678	1999-1998		1999	0.289712	0.0905187	1999-1998
1998	52	-0.0877193	-0.0160819	1998-1997		1998	799108	0.0209555	0.0170626	1998-1997		1998	-0.108675	-0.0331445	1998-1997
1997	57	0.0555556	0.155685	1997-1996		1997	782706	0.0131697	0.0658095	1997-1996		1997	0.0423859	0.0898752	1997-1996
1996	54	0.255814	0.0188161	1996-1995		1996	772532	0.118449	0.0845199	1996-1995		1996	0.137365	-0.0657039	1996-1995
1995	43	-0.218182	-0.0112648	1995-1994		1995	690717	0.0505905	0.0468895	1995-1994		1995	-0.268772	-0.0581543	1995-1994
1994	55	0.195652	0.145445	1994-1993		1994	657456	0.0431885	0.0290413	1994-1993		1994	0.152464	0.116404	1994-1993
1993	46	0.0952381	0.0142857	1993-1992		1993	630237	0.014894	0.0132306	1993-1992		1993	0.0803441	0.00105507	1993-1992
1992	42	-0.0666667	3.21667	1992-1991		1992	620988	0.0115673	0.0200604	1992-1991		1992	-0.0782339	3.19661	1992-1991
1991	45	6.5	3.25	1991-1990		1991	613887	0.0285535	0.0281533	1991-1990		1991	6.47145	3.22185	1991-1990
1990	6	0	-0.0714286	1990-1989		1990	596845	0.0277531	0.0294431	1990-1989		1990	-0.0277531	-0.100872	1990-1989
1989	6	-0.142857	-0.133929	1989-1988		1989	580728	0.0311331	0.0263974	1989-1988		1989	-0.17399	-0.160326	1989-1988
1988	7	-0.125	0.770833	1988-1987		1988	563194	0.0216616	0.0249663	1988-1987		1988	-0.146662	0.745867	1988-1987
1987	8	1.66667	0.483333	1987-1986		1987	551253	0.028271	0.0168465	1987-1986		1987	1.6384	0.466487	1987-1986
1986	3	-0.7	0.816667	1986-1985		1986	536097	0.00542192	0.00931902	1986-1985		1986	-0.705422	0.807348	1986-1985
1985	10	2.33333	1.16667	1985-1984		1985	533206	0.0132161	0.0203735	1985-1984		1985	2.32012	1.14629	1985-1984
1984	3	0	0.25	1984-1983		1984	526251	0.0275309	0.0403816	1984-1983		1984	-0.0275309	0.209618	1984-1983
1983	3	0.5	0.25	1983-1982		1983	512151	0.0532322	0.0484514	1983-1982		1983	0.446768	0.201549	1983-1982
1982	2	0	-0.25	1982-1981		1982	486266	0.0436707	0.0446443	1982-1981		1982	-0.0436707	-0.294644	1982-1981
1981	2	-0.5	0.25	1981-1980		1981	465919	0.045618	0.0354575	1981-1980		1981	-0.545618	0.214543	1981-1980
1980	4	1	1	1980-1979		1980	445592	0.0252969	0.0215848	1980-1979		1980	0.974703	0.978415	1980-1979
1979	2	1	0.5	1979-1978		1979	434598	0.0178726	0.0264106	1979-1978		1979	0.982127	0.473589	1979-1978
1978	1	0	0	1978-1977		1978	426967	0.0349486	0.0901917	1978-1977		1978	-0.0349486	-0.0901917	1978-1977
1977	1	0	-0.333333	1977-1976		1977	412549	0.145435	0.10739	1977-1976		1977	-0.145435	-0.440723	1977-1976
1976	1	-0.666667	-0.0833333	1976-1975		1976	360168	0.0693443	0.0569893	1976-1975		1976	-0.736011	-0.140323	1976-1975
1975	3	0.5	0.75	1975-1974		1975	336812	0.0446342	0.0648065	1975-1974		1975	0.455366	0.685193	1975-1974
1974	2	1	0.5	1974-1973		1974	322421	0.0849789	0.0479614	1974-1973		1974	0.915021	0.452039	1974-1973
1973	1	0	0	1973-1972		1973	297168	0.010944	0.0441023	1973-1972		1973	-0.010944	-0.0441023	1973-1972
1972	1	0	0	1972-1971		1972	293951	0.0772605	0.069541	1972-1971		1972	-0.0772605	-0.069541	1972-1971
1971	1	0		1971-1970		1971	272869	0.0618215		1971-1970		1971	-0.0618215	0	1971-1970
1970	1					1970	256982					1970	0	0

## Sheet: Metabolomics
String/subfield	(TS=(metabolom* OR metabonom*) AND PY=(1970-2020)) AND DOCUMENT TYPES: (Article OR Review)
Database	WoS, excluding ESCI
Year	Field	Yearly Percentual Increase	Biennial Average	Range (yearly)		Publication Years	Totals WoS (No ESCI)	Yearly Percentual Increase	Biennial Average	Range (yearly)		Year	GGT	Biennial GGT	Range (yearly)
2020	4612	-0.17775				2020	1489830	-0.247568				2020	0.0698182
2019	5609	0.242579	0.191815	2019-2018		2019	1980020	0.114513	0.0810219	2019-2018		2019	0.128066	0.110793	2019-2018
2018	4514	0.141052	0.150244	2018-2017		2018	1776579	0.047531	0.0420744	2018-2017		2018	0.0935206	0.10817	2018-2017
2017	3956	0.159437	0.196271	2017-2016		2017	1695968	0.0366179	0.0373671	2017-2016		2017	0.122819	0.158904	2017-2016
2016	3412	0.233104	0.200061	2016-2015		2016	1636059	0.0381164	0.0380407	2016-2015		2016	0.194988	0.162021	2016-2015
2015	2767	0.167018	0.179837	2015-2014		2015	1575988	0.037965	0.0334267	2015-2014		2015	0.129053	0.14641	2015-2014
2014	2371	0.192656	0.153503	2014-2013		2014	1518344	0.0288884	0.0419273	2014-2013		2014	0.163768	0.111576	2014-2013
2013	1988	0.11435	0.214992	2013-2012		2013	1475713	0.0549661	0.0533745	2013-2012		2013	0.0593836	0.161617	2013-2012
2012	1784	0.315634	0.280979	2012-2011		2012	1398825	0.0517829	0.0576369	2012-2011		2012	0.263851	0.223342	2012-2011
2011	1356	0.246324	0.21127	2011-2010		2011	1329956	0.0634909	0.0489897	2011-2010		2011	0.182833	0.16228	2011-2010
2010	1088	0.176216	0.203135	2010-2009		2010	1250557	0.0344885	0.0393352	2010-2009		2010	0.141728	0.1638	2010-2009
2009	925	0.230053	0.308754	2009-2008		2009	1208865	0.0441819	0.0580368	2009-2008		2009	0.185871	0.250717	2009-2008
2008	752	0.387454	0.326905	2008-2007		2008	1157715	0.0718918	0.0610206	2008-2007		2008	0.315562	0.265884	2008-2007
2007	542	0.266355	0.293671	2007-2006		2007	1080067	0.0501493	0.052072	2007-2006		2007	0.216206	0.241599	2007-2006
2006	428	0.320988	0.53617	2006-2005		2006	1028489	0.0539946	0.0524883	2006-2005		2006	0.266993	0.483681	2006-2005
2005	324	0.751351	0.555823	2005-2004		2005	975801	0.0509819	0.0483295	2005-2004		2005	0.700369	0.507493	2005-2004
2004	185	0.360294	0.651576	2004-2003		2004	928466	0.045677	0.0449702	2004-2003		2004	0.314617	0.606605	2004-2003
2003	136	0.942857	1.22143	2003-2002		2003	887909	0.0442634	0.0335741	2003-2002		2003	0.898594	1.18785	2003-2002
2002	70	1.5	1.52273	2002-2001		2002	850273	0.0228848	0.0114797	2002-2001		2002	1.47712	1.51125	2002-2001
2001	28	1.54545	3.02273	2001-2000		2001	831250	7.4592e-05	0.0109239	2001-2000		2001	1.54538	3.0118	2001-2000
2000	11	4.5	2.75	2000-1999		2000	831188	0.0217732	0.0198766	2000-1999		2000	4.47823	2.73012	2000-1999
1999	2	1	#DIV/0!	1999-1998		1999	813476	0.01798	0.0194678	1999-1998		1999	0.98202	#DIV/0!	1999-1998
1998	1	#DIV/0!	#DIV/0!	1998-1997		1998	799108	0.0209555	0.0170626	1998-1997		1998	#DIV/0!	#DIV/0!	1998-1997
1997	0	#DIV/0!	#DIV/0!	1997-1996		1997	782706	0.0131697	0.0658095	1997-1996		1997	#DIV/0!	#DIV/0!	1997-1996
1996	0	#DIV/0!	#DIV/0!	1996-1995		1996	772532	0.118449	0.0845199	1996-1995		1996	#DIV/0!	#DIV/0!	1996-1995
1995	0	#DIV/0!	#DIV/0!	1995-1994		1995	690717	0.0505905	0.0468895	1995-1994		1995	#DIV/0!	#DIV/0!	1995-1994
1994	0	#DIV/0!	#DIV/0!	1994-1993		1994	657456	0.0431885	0.0290413	1994-1993		1994	#DIV/0!	#DIV/0!	1994-1993
1993	0	#DIV/0!	#DIV/0!	1993-1992		1993	630237	0.014894	0.0132306	1993-1992		1993	#DIV/0!	#DIV/0!	1993-1992
1992	0	#DIV/0!	#DIV/0!	1992-1991		1992	620988	0.0115673	0.0200604	1992-1991		1992	#DIV/0!	#DIV/0!	1992-1991
1991	0	#DIV/0!	#DIV/0!	1991-1990		1991	613887	0.0285535	0.0281533	1991-1990		1991	#DIV/0!	#DIV/0!	1991-1990
1990	0	#DIV/0!	#DIV/0!	1990-1989		1990	596845	0.0277531	0.0294431	1990-1989		1990	#DIV/0!	#DIV/0!	1990-1989
1989	0	#DIV/0!	#DIV/0!	1989-1988		1989	580728	0.0311331	0.0263974	1989-1988		1989	#DIV/0!	#DIV/0!	1989-1988
1988	0	#DIV/0!	#DIV/0!	1988-1987		1988	563194	0.0216616	0.0249663	1988-1987		1988	#DIV/0!	#DIV/0!	1988-1987
1987	0	#DIV/0!	#DIV/0!	1987-1986		1987	551253	0.028271	0.0168465	1987-1986		1987	#DIV/0!	#DIV/0!	1987-1986
1986	0	#DIV/0!	#DIV/0!	1986-1985		1986	536097	0.00542192	0.00931902	1986-1985		1986	#DIV/0!	#DIV/0!	1986-1985
1985	0	#DIV/0!	#DIV/0!	1985-1984		1985	533206	0.0132161	0.0203735	1985-1984		1985	#DIV/0!	#DIV/0!	1985-1984
1984	0	#DIV/0!	#DIV/0!	1984-1983		1984	526251	0.0275309	0.0403816	1984-1983		1984	#DIV/0!	#DIV/0!	1984-1983
1983	0	#DIV/0!	#DIV/0!	1983-1982		1983	512151	0.0532322	0.0484514	1983-1982		1983	#DIV/0!	#DIV/0!	1983-1982
1982	0	#DIV/0!	#DIV/0!	1982-1981		1982	486266	0.0436707	0.0446443	1982-1981		1982	#DIV/0!	#DIV/0!	1982-1981
1981	0	#DIV/0!	#DIV/0!	1981-1980		1981	465919	0.045618	0.0354575	1981-1980		1981	#DIV/0!	#DIV/0!	1981-1980
1980	0	#DIV/0!	#DIV/0!	1980-1979		1980	445592	0.0252969	0.0215848	1980-1979		1980	#DIV/0!	#DIV/0!	1980-1979
1979	0	#DIV/0!	#DIV/0!	1979-1978		1979	434598	0.0178726	0.0264106	1979-1978		1979	#DIV/0!	#DIV/0!	1979-1978
1978	0	#DIV/0!	#DIV/0!	1978-1977		1978	426967	0.0349486	0.0901917	1978-1977		1978	#DIV/0!	#DIV/0!	1978-1977
1977	0	#DIV/0!	#DIV/0!	1977-1976		1977	412549	0.145435	0.10739	1977-1976		1977	#DIV/0!	#DIV/0!	1977-1976
1976	0	#DIV/0!	#DIV/0!	1976-1975		1976	360168	0.0693443	0.0569893	1976-1975		1976	#DIV/0!	#DIV/0!	1976-1975
1975	0	#DIV/0!	#DIV/0!	1975-1974		1975	336812	0.0446342	0.0648065	1975-1974		1975	#DIV/0!	#DIV/0!	1975-1974
1974	0	#DIV/0!	#DIV/0!	1974-1973		1974	322421	0.0849789	0.0479614	1974-1973		1974	#DIV/0!	#DIV/0!	1974-1973
1973	0	#DIV/0!	#DIV/0!	1973-1972		1973	297168	0.010944	0.0441023	1973-1972		1973	#DIV/0!	#DIV/0!	1973-1972
1972	0	#DIV/0!	#DIV/0!	1972-1971		1972	293951	0.0772605	0.069541	1972-1971		1972	#DIV/0!	#DIV/0!	1972-1971
1971	0	#DIV/0!		1971-1970		1971	272869	0.0618215		1971-1970		1971	#DIV/0!	0	1971-1970
1970	0					1970	256982					1970	0	0

## Sheet: Transcriptomics
String/subfield	(TS=(transcriptom*) AND PY=(1970-2020)) AND DOCUMENT TYPES: (Article OR Review)
Database	WoS, excluding ESCI
Year	Field	Yearly Percentual Increase	Biennial Average	Range (yearly)		Publication Years	Totals WoS (No ESCI)	Yearly Percentual Increase	Biennial Average	Range (yearly)		Year	GGT	Biennial GGT	Range (yearly)
2020	10557	-0.195289				2020	1489830	-0.247568				2020	0.0522789
2019	13119	0.253727	0.183815	2019-2018		2019	1980020	0.114513	0.0810219	2019-2018		2019	0.139214	0.102793	2019-2018
2018	10464	0.113902	0.1332	2018-2017		2018	1776579	0.047531	0.0420744	2018-2017		2018	0.0663715	0.0911251	2018-2017
2017	9394	0.152497	0.1573	2017-2016		2017	1695968	0.0366179	0.0373671	2017-2016		2017	0.115879	0.119933	2017-2016
2016	8151	0.162104	0.177278	2016-2015		2016	1636059	0.0381164	0.0380407	2016-2015		2016	0.123988	0.139237	2016-2015
2015	7014	0.192452	0.198519	2015-2014		2015	1575988	0.037965	0.0334267	2015-2014		2015	0.154487	0.165093	2015-2014
2014	5882	0.204587	0.181397	2014-2013		2014	1518344	0.0288884	0.0419273	2014-2013		2014	0.175699	0.13947	2014-2013
2013	4883	0.158207	0.253016	2013-2012		2013	1475713	0.0549661	0.0533745	2013-2012		2013	0.103241	0.199642	2013-2012
2012	4216	0.347826	0.285807	2012-2011		2012	1398825	0.0517829	0.0576369	2012-2011		2012	0.296043	0.22817	2012-2011
2011	3128	0.223787	0.264267	2011-2010		2011	1329956	0.0634909	0.0489897	2011-2010		2011	0.160296	0.215278	2011-2010
2010	2556	0.304747	0.227535	2010-2009		2010	1250557	0.0344885	0.0393352	2010-2009		2010	0.270259	0.1882	2010-2009
2009	1959	0.150323	0.205902	2009-2008		2009	1208865	0.0441819	0.0580368	2009-2008		2009	0.106141	0.147865	2009-2008
2008	1703	0.261481	0.228615	2008-2007		2008	1157715	0.0718918	0.0610206	2008-2007		2008	0.18959	0.167594	2008-2007
2007	1350	0.195748	0.231432	2007-2006		2007	1080067	0.0501493	0.052072	2007-2006		2007	0.145599	0.17936	2007-2006
2006	1129	0.267116	0.373591	2006-2005		2006	1028489	0.0539946	0.0524883	2006-2005		2006	0.213121	0.321103	2006-2005
2005	891	0.480066	0.454998	2005-2004		2005	975801	0.0509819	0.0483295	2005-2004		2005	0.429085	0.406668	2005-2004
2004	602	0.429929	0.654697	2004-2003		2004	928466	0.045677	0.0449702	2004-2003		2004	0.384252	0.609726	2004-2003
2003	421	0.879464	1.0064	2003-2002		2003	887909	0.0442634	0.0335741	2003-2002		2003	0.835201	0.972825	2003-2002
2002	224	1.13333	1.94167	2002-2001		2002	850273	0.0228848	0.0114797	2002-2001		2002	1.11045	1.93019	2002-2001
2001	105	2.75	2.14773	2001-2000		2001	831250	7.4592e-05	0.0109239	2001-2000		2001	2.74993	2.1368	2001-2000
2000	28	1.54545	5.77273	2000-1999		2000	831188	0.0217732	0.0198766	2000-1999		2000	1.52368	5.75285	2000-1999
1999	11	10	4.75	1999-1998		1999	813476	0.01798	0.0194678	1999-1998		1999	9.98202	4.73053	1999-1998
1998	1	-0.5	#DIV/0!	1998-1997		1998	799108	0.0209555	0.0170626	1998-1997		1998	-0.520956	#DIV/0!	1998-1997
1997	2	#DIV/0!	#DIV/0!	1997-1996		1997	782706	0.0131697	0.0658095	1997-1996		1997	#DIV/0!	#DIV/0!	1997-1996
1996	0	#DIV/0!	#DIV/0!	1996-1995		1996	772532	0.118449	0.0845199	1996-1995		1996	#DIV/0!	#DIV/0!	1996-1995
1995	0	#DIV/0!	#DIV/0!	1995-1994		1995	690717	0.0505905	0.0468895	1995-1994		1995	#DIV/0!	#DIV/0!	1995-1994
1994	0	#DIV/0!	#DIV/0!	1994-1993		1994	657456	0.0431885	0.0290413	1994-1993		1994	#DIV/0!	#DIV/0!	1994-1993
1993	0	#DIV/0!	#DIV/0!	1993-1992		1993	630237	0.014894	0.0132306	1993-1992		1993	#DIV/0!	#DIV/0!	1993-1992
1992	0	#DIV/0!	#DIV/0!	1992-1991		1992	620988	0.0115673	0.0200604	1992-1991		1992	#DIV/0!	#DIV/0!	1992-1991
1991	0	#DIV/0!	#DIV/0!	1991-1990		1991	613887	0.0285535	0.0281533	1991-1990		1991	#DIV/0!	#DIV/0!	1991-1990
1990	0	#DIV/0!	#DIV/0!	1990-1989		1990	596845	0.0277531	0.0294431	1990-1989		1990	#DIV/0!	#DIV/0!	1990-1989
1989	0	#DIV/0!	#DIV/0!	1989-1988		1989	580728	0.0311331	0.0263974	1989-1988		1989	#DIV/0!	#DIV/0!	1989-1988
1988	0	#DIV/0!	#DIV/0!	1988-1987		1988	563194	0.0216616	0.0249663	1988-1987		1988	#DIV/0!	#DIV/0!	1988-1987
1987	0	#DIV/0!	#DIV/0!	1987-1986		1987	551253	0.028271	0.0168465	1987-1986		1987	#DIV/0!	#DIV/0!	1987-1986
1986	0	#DIV/0!	#DIV/0!	1986-1985		1986	536097	0.00542192	0.00931902	1986-1985		1986	#DIV/0!	#DIV/0!	1986-1985
1985	0	#DIV/0!	#DIV/0!	1985-1984		1985	533206	0.0132161	0.0203735	1985-1984		1985	#DIV/0!	#DIV/0!	1985-1984
1984	0	#DIV/0!	#DIV/0!	1984-1983		1984	526251	0.0275309	0.0403816	1984-1983		1984	#DIV/0!	#DIV/0!	1984-1983
1983	0	#DIV/0!	#DIV/0!	1983-1982		1983	512151	0.0532322	0.0484514	1983-1982		1983	#DIV/0!	#DIV/0!	1983-1982
1982	0	#DIV/0!	#DIV/0!	1982-1981		1982	486266	0.0436707	0.0446443	1982-1981		1982	#DIV/0!	#DIV/0!	1982-1981
1981	0	#DIV/0!	#DIV/0!	1981-1980		1981	465919	0.045618	0.0354575	1981-1980		1981	#DIV/0!	#DIV/0!	1981-1980
1980	0	#DIV/0!	#DIV/0!	1980-1979		1980	445592	0.0252969	0.0215848	1980-1979		1980	#DIV/0!	#DIV/0!	1980-1979
1979	0	#DIV/0!	#DIV/0!	1979-1978		1979	434598	0.0178726	0.0264106	1979-1978		1979	#DIV/0!	#DIV/0!	1979-1978
1978	0	#DIV/0!	#DIV/0!	1978-1977		1978	426967	0.0349486	0.0901917	1978-1977		1978	#DIV/0!	#DIV/0!	1978-1977
1977	0	#DIV/0!	#DIV/0!	1977-1976		1977	412549	0.145435	0.10739	1977-1976		1977	#DIV/0!	#DIV/0!	1977-1976
1976	0	#DIV/0!	#DIV/0!	1976-1975		1976	360168	0.0693443	0.0569893	1976-1975		1976	#DIV/0!	#DIV/0!	1976-1975
1975	0	#DIV/0!	#DIV/0!	1975-1974		1975	336812	0.0446342	0.0648065	1975-1974		1975	#DIV/0!	#DIV/0!	1975-1974
1974	0	#DIV/0!	#DIV/0!	1974-1973		1974	322421	0.0849789	0.0479614	1974-1973		1974	#DIV/0!	#DIV/0!	1974-1973
1973	0	#DIV/0!	#DIV/0!	1973-1972		1973	297168	0.010944	0.0441023	1973-1972		1973	#DIV/0!	#DIV/0!	1973-1972
1972	0	#DIV/0!	#DIV/0!	1972-1971		1972	293951	0.0772605	0.069541	1972-1971		1972	#DIV/0!	#DIV/0!	1972-1971
1971	0	#DIV/0!		1971-1970		1971	272869	0.0618215		1971-1970		1971	#DIV/0!	0	1971-1970
1970	0					1970	256982					1970	0	0

## Sheet: Proteomics
String/subfield	TOPIC: ("proteom*"), Refined by: DOCUMENT TYPES: ( ARTICLE OR REVIEW )
Database	WoS, excluding ESCI
Year	Field	Yearly Percentual Increase	Biennial Average	Range (yearly)		Publication Years	Totals WoS (No ESCI)	Yearly Percentual Increase	Biennial Average	Range (yearly)		Year	GGT	Biennial GGT	Range (yearly)
2020	7087	-0.241464				2020	1489830	-0.247568				2020	0.00610401
2019	9343	0.115183	0.0699445	2019-2018		2019	1980020	0.114513	0.0810219	2019-2018		2019	0.000669841	-0.0110773	2019-2018
2018	8378	0.0247065	0.0175435	2018-2017		2018	1776579	0.047531	0.0420744	2018-2017		2018	-0.0228245	-0.0245309	2018-2017
2017	8176	0.0103806	0.0300314	2017-2016		2017	1695968	0.0366179	0.0373671	2017-2016		2017	-0.0262372	-0.00733573	2017-2016
2016	8092	0.0496822	0.0550337	2016-2015		2016	1636059	0.0381164	0.0380407	2016-2015		2016	0.0115658	0.0169929	2016-2015
2015	7709	0.0603851	0.0376615	2015-2014		2015	1575988	0.037965	0.0334267	2015-2014		2015	0.0224201	0.00423478	2015-2014
2014	7270	0.0149379	0.00215126	2014-2013		2014	1518344	0.0288884	0.0419273	2014-2013		2014	-0.0139505	-0.039776	2014-2013
2013	7163	-0.0106354	0.0548804	2013-2012		2013	1475713	0.0549661	0.0533745	2013-2012		2013	-0.0656015	0.00150588	2013-2012
2012	7240	0.120396	0.0885709	2012-2011		2012	1398825	0.0517829	0.0576369	2012-2011		2012	0.0686132	0.030934	2012-2011
2011	6462	0.0567457	0.0920712	2011-2010		2011	1329956	0.0634909	0.0489897	2011-2010		2011	-0.0067452	0.0430815	2011-2010
2010	6115	0.127397	0.12012	2010-2009		2010	1250557	0.0344885	0.0393352	2010-2009		2010	0.0929082	0.080785	2010-2009
2009	5424	0.112844	0.0961782	2009-2008		2009	1208865	0.0441819	0.0580368	2009-2008		2009	0.0686618	0.0381414	2009-2008
2008	4874	0.0795127	0.0855736	2008-2007		2008	1157715	0.0718918	0.0610206	2008-2007		2008	0.0076209	0.024553	2008-2007
2007	4515	0.0916344	0.162578	2007-2006		2007	1080067	0.0501493	0.052072	2007-2006		2007	0.0414851	0.110506	2007-2006
2006	4136	0.233522	0.209793	2006-2005		2006	1028489	0.0539946	0.0524883	2006-2005		2006	0.179528	0.157304	2006-2005
2005	3353	0.186063	0.331537	2005-2004		2005	975801	0.0509819	0.0483295	2005-2004		2005	0.135081	0.283208	2005-2004
2004	2827	0.477011	0.42998	2004-2003		2004	928466	0.045677	0.0449702	2004-2003		2004	0.431335	0.38501	2004-2003
2003	1914	0.382948	0.476945	2003-2002		2003	887909	0.0442634	0.0335741	2003-2002		2003	0.338685	0.443371	2003-2002
2002	1384	0.570942	0.834281	2002-2001		2002	850273	0.0228848	0.0114797	2002-2001		2002	0.548057	0.822801	2002-2001
2001	881	1.09762	1.18394	2001-2000		2001	831250	7.4592e-05	#DIV/0!	2001-2000		2001	1.09754	#DIV/0!	2001-2000
2000	420	1.27027	1.26318	2000-1999		2000	831188	#DIV/0!	#DIV/0!	2000-1999		2000	#DIV/0!	#DIV/0!	2000-1999
1999	185	1.2561	0.964783	1999-1998		1999		#DIV/0!	#DIV/0!	1999-1998		1999	#DIV/0!	#DIV/0!	1999-1998
1998	82	0.673469	#DIV/0!	1998-1997		1998		#DIV/0!	#DIV/0!	1998-1997		1998	#DIV/0!	#DIV/0!	1998-1997
1997	49	#DIV/0!	#DIV/0!	1997-1996		1997		#DIV/0!	#DIV/0!	1997-1996		1997	#DIV/0!	#DIV/0!	1997-1996
1996		#DIV/0!	#DIV/0!	1996-1995		1996		#DIV/0!	#DIV/0!	1996-1995		1996	#DIV/0!	#DIV/0!	1996-1995
1995		#DIV/0!	#DIV/0!	1995-1994		1995		#DIV/0!	#DIV/0!	1995-1994		1995	#DIV/0!	#DIV/0!	1995-1994
1994		#DIV/0!	#DIV/0!	1994-1993		1994		#DIV/0!	#DIV/0!	1994-1993		1994	#DIV/0!	#DIV/0!	1994-1993
1993		#DIV/0!	#DIV/0!	1993-1992		1993		#DIV/0!	#DIV/0!	1993-1992		1993	#DIV/0!	#DIV/0!	1993-1992
1992		#DIV/0!	#DIV/0!	1992-1991		1992		#DIV/0!	#DIV/0!	1992-1991		1992	#DIV/0!	#DIV/0!	1992-1991
1991		#DIV/0!	#DIV/0!	1991-1990		1991		#DIV/0!	#DIV/0!	1991-1990		1991	#DIV/0!	#DIV/0!	1991-1990
1990		#DIV/0!	#DIV/0!	1990-1989		1990		#DIV/0!	#DIV/0!	1990-1989		1990	#DIV/0!	#DIV/0!	1990-1989
1989		#DIV/0!	#DIV/0!	1989-1988		1989		#DIV/0!	#DIV/0!	1989-1988		1989	#DIV/0!	#DIV/0!	1989-1988
1988		#DIV/0!	#DIV/0!	1988-1987		1988		#DIV/0!	#DIV/0!	1988-1987		1988	#DIV/0!	#DIV/0!	1988-1987
1987		#DIV/0!	#DIV/0!	1987-1986		1987		#DIV/0!	#DIV/0!	1987-1986		1987	#DIV/0!	#DIV/0!	1987-1986
1986		#DIV/0!	#DIV/0!	1986-1985		1986		#DIV/0!	#DIV/0!	1986-1985		1986	#DIV/0!	#DIV/0!	1986-1985
1985		#DIV/0!	#DIV/0!	1985-1984		1985		#DIV/0!	#DIV/0!	1985-1984		1985	#DIV/0!	#DIV/0!	1985-1984
1984		#DIV/0!	#DIV/0!	1984-1983		1984		#DIV/0!	#DIV/0!	1984-1983		1984	#DIV/0!	#DIV/0!	1984-1983
1983		#DIV/0!	#DIV/0!	1983-1982		1983		#DIV/0!	#DIV/0!	1983-1982		1983	#DIV/0!	#DIV/0!	1983-1982
1982		#DIV/0!	#DIV/0!	1982-1981		1982		#DIV/0!	#DIV/0!	1982-1981		1982	#DIV/0!	#DIV/0!	1982-1981
1981		#DIV/0!	#DIV/0!	1981-1980		1981		#DIV/0!	#DIV/0!	1981-1980		1981	#DIV/0!	#DIV/0!	1981-1980
1980		#DIV/0!	#DIV/0!	1980-1979		1980		#DIV/0!	#DIV/0!	1980-1979		1980	#DIV/0!	#DIV/0!	1980-1979
1979		#DIV/0!	#DIV/0!	1979-1978		1979		#DIV/0!	#DIV/0!	1979-1978		1979	#DIV/0!	#DIV/0!	1979-1978
1978		#DIV/0!	#DIV/0!	1978-1977		1978		#DIV/0!	#DIV/0!	1978-1977		1978	#DIV/0!	#DIV/0!	1978-1977
1977		#DIV/0!	#DIV/0!	1977-1976		1977		#DIV/0!	#DIV/0!	1977-1976		1977	#DIV/0!	#DIV/0!	1977-1976
1976		#DIV/0!	#DIV/0!	1976-1975		1976		#DIV/0!	#DIV/0!	1976-1975		1976	#DIV/0!	#DIV/0!	1976-1975
1975		#DIV/0!	#DIV/0!	1975-1974		1975		#DIV/0!	#DIV/0!	1975-1974		1975	#DIV/0!	#DIV/0!	1975-1974
1974		#DIV/0!	#DIV/0!	1974-1973		1974		#DIV/0!	#DIV/0!	1974-1973		1974	#DIV/0!	#DIV/0!	1974-1973
1973		#DIV/0!	#DIV/0!	1973-1972		1973		#DIV/0!	#DIV/0!	1973-1972		1973	#DIV/0!	#DIV/0!	1973-1972
1972		#DIV/0!	#DIV/0!	1972-1971		1972		#DIV/0!	#DIV/0!	1972-1971		1972	#DIV/0!	#DIV/0!	1972-1971
1971		#DIV/0!		1971-1970		1971		#DIV/0!		1971-1970		1971	#DIV/0!	0	1971-1970
1970						1970						1970	0	0

## Sheet: Genomics
String/subfield	("genomic*"), Refined by: DOCUMENT TYPES: ( ARTICLE OR REVIEW )
Database	WoS, excluding ESCI
Year	Field	Yearly Percentual Increase	Biennial Average	Range (yearly)		Publication Years	Totals WoS (No ESCI)	Yearly Percentual Increase	Biennial Average	Range (yearly)		Year	GGT	Biennial GGT	Range (yearly)
2020	15709	-0.259114				2020	1489830	-0.247568				2020	-0.0115461
2019	21203	0.117006	0.069651	2019-2018		2019	1980020	0.114513	0.0810219	2019-2018		2019	0.0024928	-0.0113709	2019-2018
2018	18982	0.0222964	0.0363207	2018-2017		2018	1776579	0.047531	0.0420744	2018-2017		2018	-0.0252345	-0.00575368	2018-2017
2017	18568	0.0503451	0.047881	2017-2016		2017	1695968	0.0366179	0.0373671	2017-2016		2017	0.0137272	0.0105138	2017-2016
2016	17678	0.0454169	0.0541686	2016-2015		2016	1636059	0.0381164	0.0380407	2016-2015		2016	0.00730051	0.0161279	2016-2015
2015	16910	0.0629204	0.0505818	2015-2014		2015	1575988	0.037965	0.0334267	2015-2014		2015	0.0249553	0.017155	2015-2014
2014	15909	0.0382432	0.0390741	2014-2013		2014	1518344	0.0288884	0.0419273	2014-2013		2014	0.00935476	-0.00285319	2014-2013
2013	15323	0.039905	0.0614415	2013-2012		2013	1475713	0.0549661	0.0533745	2013-2012		2013	-0.0150611	0.00806702	2013-2012
2012	14735	0.0829781	0.0756442	2012-2011		2012	1398825	0.0517829	0.0576369	2012-2011		2012	0.0311952	0.0180073	2012-2011
2011	13606	0.0683103	0.0673545	2011-2010		2011	1329956	0.0634909	0.0489897	2011-2010		2011	0.00481939	0.0183648	2011-2010
2010	12736	0.0663987	0.0592764	2010-2009		2010	1250557	0.0344885	0.0393352	2010-2009		2010	0.0319102	0.0199412	2010-2009
2009	11943	0.052154	0.0625137	2009-2008		2009	1208865	0.0441819	0.0580368	2009-2008		2009	0.00797214	0.00447682	2009-2008
2008	11351	0.0728733	0.0574136	2008-2007		2008	1157715	0.0718918	0.0610206	2008-2007		2008	0.00098151	-0.00360694	2008-2007
2007	10580	0.0419539	0.0492258	2007-2006		2007	1080067	0.0501493	0.052072	2007-2006		2007	-0.00819539	-0.00284612	2007-2006
2006	10154	0.0564978	0.0590088	2006-2005		2006	1028489	0.0539946	0.0524883	2006-2005		2006	0.00250315	0.00652049	2006-2005
2005	9611	0.0615198	0.0967764	2005-2004		2005	975801	0.0509819	0.0483295	2005-2004		2005	0.0105378	0.0484469	2005-2004
2004	9054	0.132033	0.0916474	2004-2003		2004	928466	0.045677	0.0449702	2004-2003		2004	0.086356	0.0466772	2004-2003
2003	7998	0.0512618	0.0758189	2003-2002		2003	887909	0.0442634	0.0335741	2003-2002		2003	0.0069984	0.0422448	2003-2002
2002	7608	0.100376	0.0902599	2002-2001		2002	850273	0.0228848	0.0114797	2002-2001		2002	0.0774912	0.0787802	2002-2001
2001	6914	0.0801437	0.0924536	2001-2000		2001	831250	7.4592e-05	0.0109239	2001-2000		2001	0.0800691	0.0815297	2001-2000
2000	6401	0.104764	0.0953996	2000-1999		2000	831188	0.0217732	0.0198766	2000-1999		2000	0.0829903	0.0755229	2000-1999
1999	5794	0.0860356	0.0897487	1999-1998		1999	813476	0.01798	0.0194678	1999-1998		1999	0.0680556	0.0702809	1999-1998
1998	5335	0.0934618	#DIV/0!	1998-1997		1998	799108	0.0209555	#DIV/0!	1998-1997		1998	0.0725063	#DIV/0!	1998-1997
1997	4879	#DIV/0!	#DIV/0!	1997-1996		1997	782706	#DIV/0!	#DIV/0!	1997-1996		1997	#DIV/0!	#DIV/0!	1997-1996
1996		#DIV/0!	#DIV/0!	1996-1995		1996		#DIV/0!	#DIV/0!	1996-1995		1996	#DIV/0!	#DIV/0!	1996-1995
1995		#DIV/0!	#DIV/0!	1995-1994		1995		#DIV/0!	#DIV/0!	1995-1994		1995	#DIV/0!	#DIV/0!	1995-1994
1994		#DIV/0!	#DIV/0!	1994-1993		1994		#DIV/0!	#DIV/0!	1994-1993		1994	#DIV/0!	#DIV/0!	1994-1993
1993		#DIV/0!	#DIV/0!	1993-1992		1993		#DIV/0!	#DIV/0!	1993-1992		1993	#DIV/0!	#DIV/0!	1993-1992
1992		#DIV/0!	#DIV/0!	1992-1991		1992		#DIV/0!	#DIV/0!	1992-1991		1992	#DIV/0!	#DIV/0!	1992-1991
1991		#DIV/0!	#DIV/0!	1991-1990		1991		#DIV/0!	#DIV/0!	1991-1990		1991	#DIV/0!	#DIV/0!	1991-1990
1990		#DIV/0!	#DIV/0!	1990-1989		1990		#DIV/0!	#DIV/0!	1990-1989		1990	#DIV/0!	#DIV/0!	1990-1989
1989		#DIV/0!	#DIV/0!	1989-1988		1989		#DIV/0!	#DIV/0!	1989-1988		1989	#DIV/0!	#DIV/0!	1989-1988
1988		#DIV/0!	#DIV/0!	1988-1987		1988		#DIV/0!	#DIV/0!	1988-1987		1988	#DIV/0!	#DIV/0!	1988-1987
1987		#DIV/0!	#DIV/0!	1987-1986		1987		#DIV/0!	#DIV/0!	1987-1986		1987	#DIV/0!	#DIV/0!	1987-1986
1986		#DIV/0!	#DIV/0!	1986-1985		1986		#DIV/0!	#DIV/0!	1986-1985		1986	#DIV/0!	#DIV/0!	1986-1985
1985		#DIV/0!	#DIV/0!	1985-1984		1985		#DIV/0!	#DIV/0!	1985-1984		1985	#DIV/0!	#DIV/0!	1985-1984
1984		#DIV/0!	#DIV/0!	1984-1983		1984		#DIV/0!	#DIV/0!	1984-1983		1984	#DIV/0!	#DIV/0!	1984-1983
1983		#DIV/0!	#DIV/0!	1983-1982		1983		#DIV/0!	#DIV/0!	1983-1982		1983	#DIV/0!	#DIV/0!	1983-1982
1982		#DIV/0!	#DIV/0!	1982-1981		1982		#DIV/0!	#DIV/0!	1982-1981		1982	#DIV/0!	#DIV/0!	1982-1981
1981		#DIV/0!	#DIV/0!	1981-1980		1981		#DIV/0!	#DIV/0!	1981-1980		1981	#DIV/0!	#DIV/0!	1981-1980
1980		#DIV/0!	#DIV/0!	1980-1979		1980		#DIV/0!	#DIV/0!	1980-1979		1980	#DIV/0!	#DIV/0!	1980-1979
1979		#DIV/0!	#DIV/0!	1979-1978		1979		#DIV/0!	#DIV/0!	1979-1978		1979	#DIV/0!	#DIV/0!	1979-1978
1978		#DIV/0!	#DIV/0!	1978-1977		1978		#DIV/0!	#DIV/0!	1978-1977		1978	#DIV/0!	#DIV/0!	1978-1977
1977		#DIV/0!	#DIV/0!	1977-1976		1977		#DIV/0!	#DIV/0!	1977-1976		1977	#DIV/0!	#DIV/0!	1977-1976
1976		#DIV/0!	#DIV/0!	1976-1975		1976		#DIV/0!	#DIV/0!	1976-1975		1976	#DIV/0!	#DIV/0!	1976-1975
1975		#DIV/0!	#DIV/0!	1975-1974		1975		#DIV/0!	#DIV/0!	1975-1974		1975	#DIV/0!	#DIV/0!	1975-1974
1974		#DIV/0!	#DIV/0!	1974-1973		1974		#DIV/0!	#DIV/0!	1974-1973		1974	#DIV/0!	#DIV/0!	1974-1973
1973		#DIV/0!	#DIV/0!	1973-1972		1973		#DIV/0!	#DIV/0!	1973-1972		1973	#DIV/0!	#DIV/0!	1973-1972
1972		#DIV/0!	#DIV/0!	1972-1971		1972		#DIV/0!	#DIV/0!	1972-1971		1972	#DIV/0!	#DIV/0!	1972-1971
1971		#DIV/0!		1971-1970		1971		#DIV/0!		1971-1970		1971	#DIV/0!	0	1971-1970
1970						1970						1970	0	0

[truncated: 45 more sheets: Mitochondria, Phytochemistry, Autophagy, Immunotherapy, Mental Health, Vaccines, Fetal and Neonatal Medicine, Disease Ecology, Macroecology, Invasion Biology, Population Ecology, Cross-species Transmission, Point-of-care, Coronavirus, Food Authentication, Food Fraud, Pesticides, Food Packaging, Cannabinoids, Edible Insects …]
